# Supplementary material
Source: HighWire-hosted journal article supplement (https://gut.bmj.com/content/gutjnl-2019-319002)

Figure S1

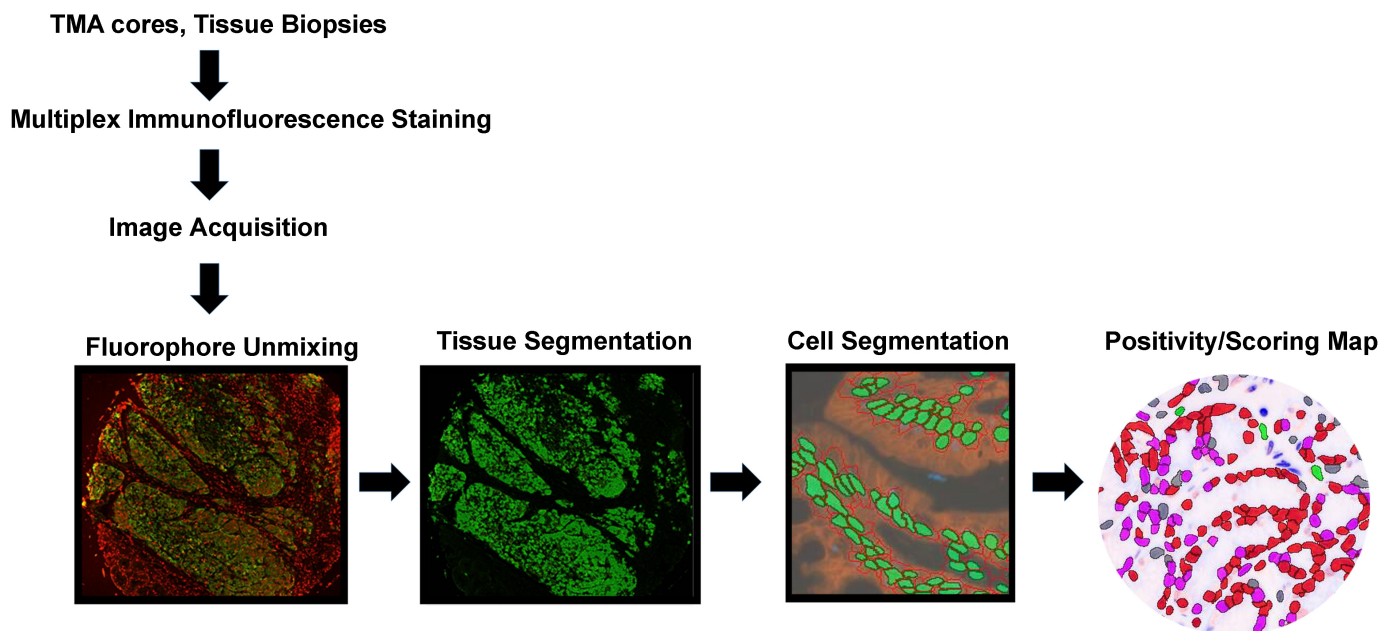

Supplement: inline-supplementary-material-2 [file inline-supplementary-material-2.pdf]

### Supplementary Figure S2

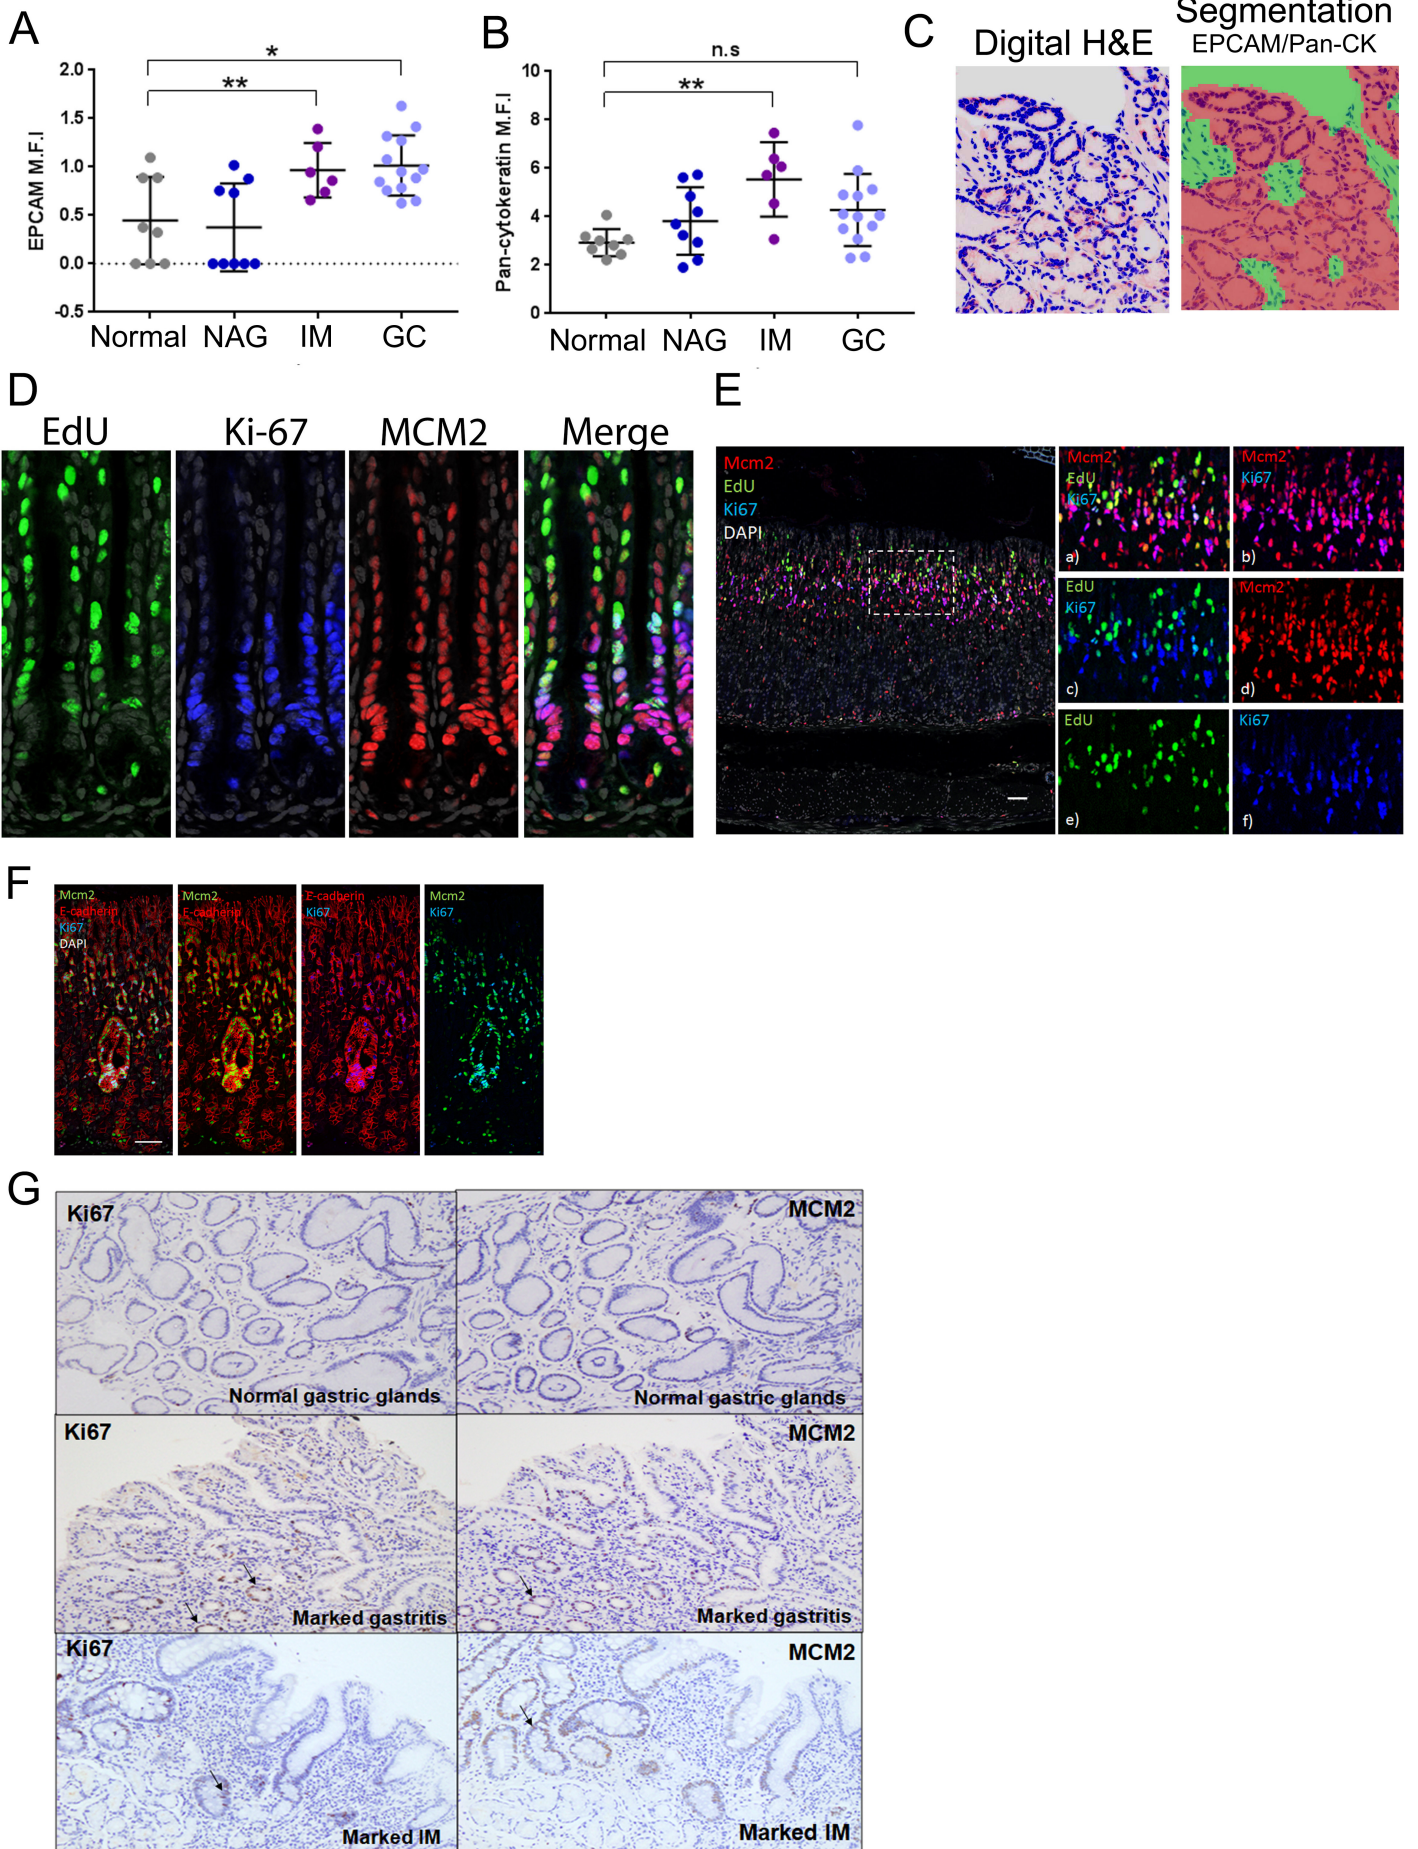

Supplement: inline-supplementary-material-5 [file inline-supplementary-material-5.pdf]

## Supplementary Figure S3

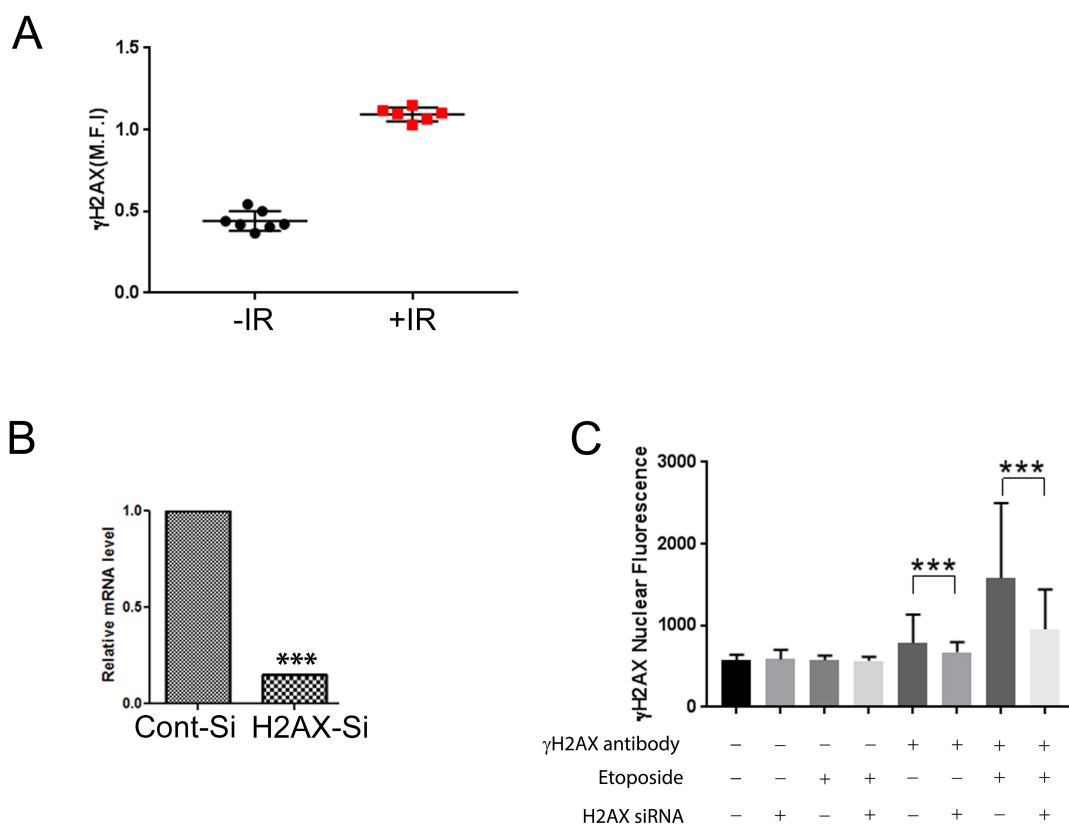

Supplement: inline-supplementary-material-6 [file inline-supplementary-material-6.pdf]

## Supplementary Figure S4

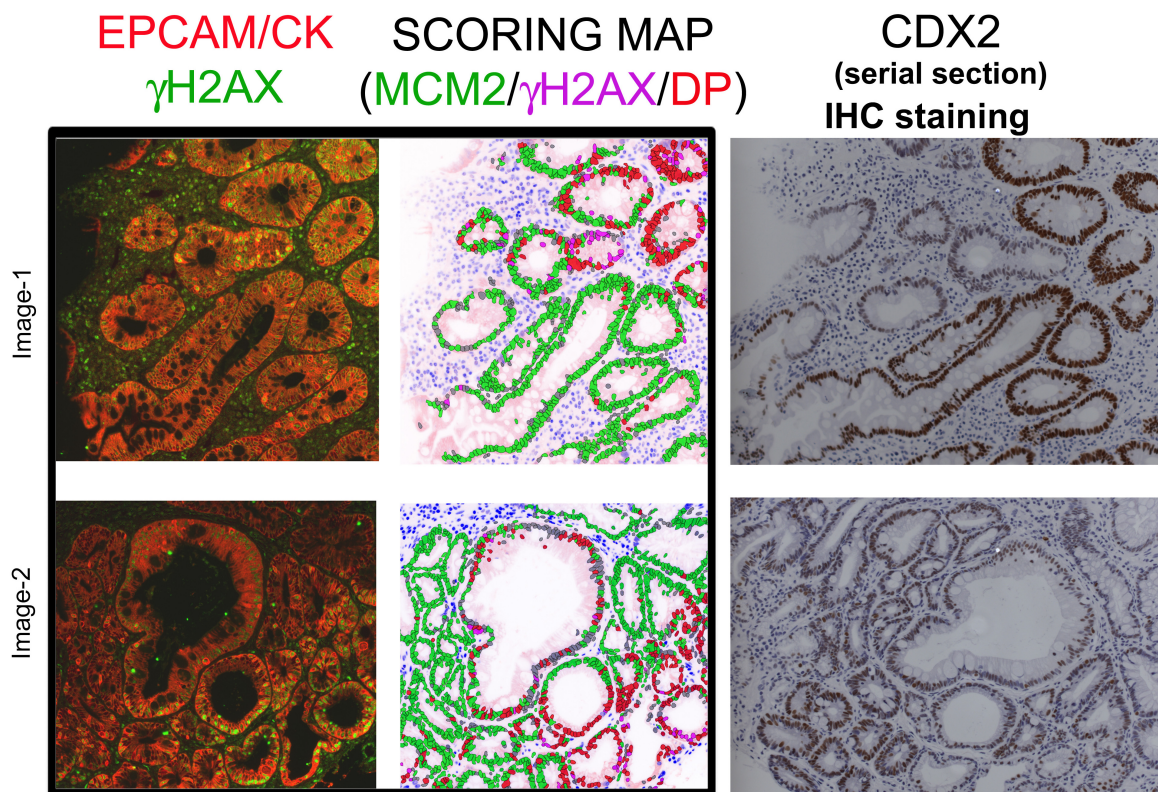

Supplement: inline-supplementary-material-7 [file inline-supplementary-material-7.pdf]

### Supplementary Figure S5

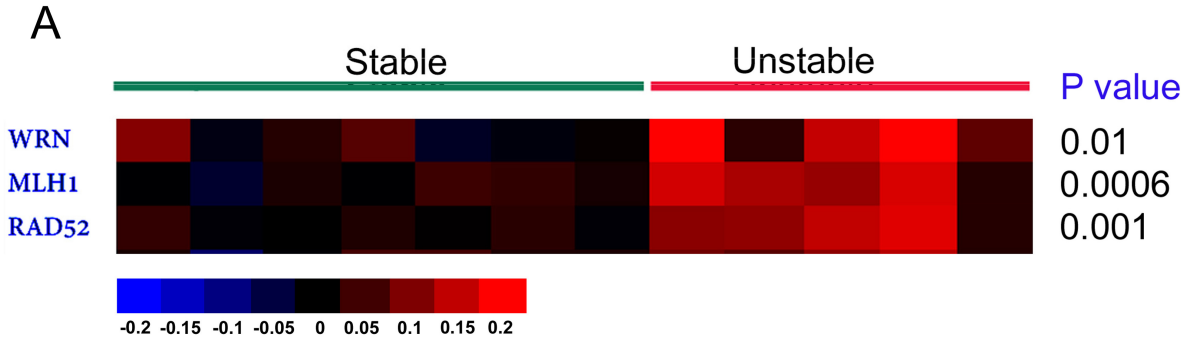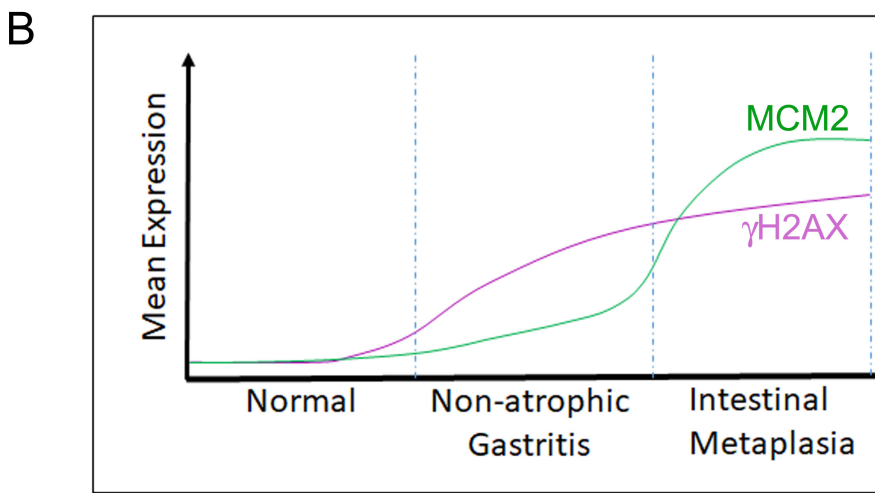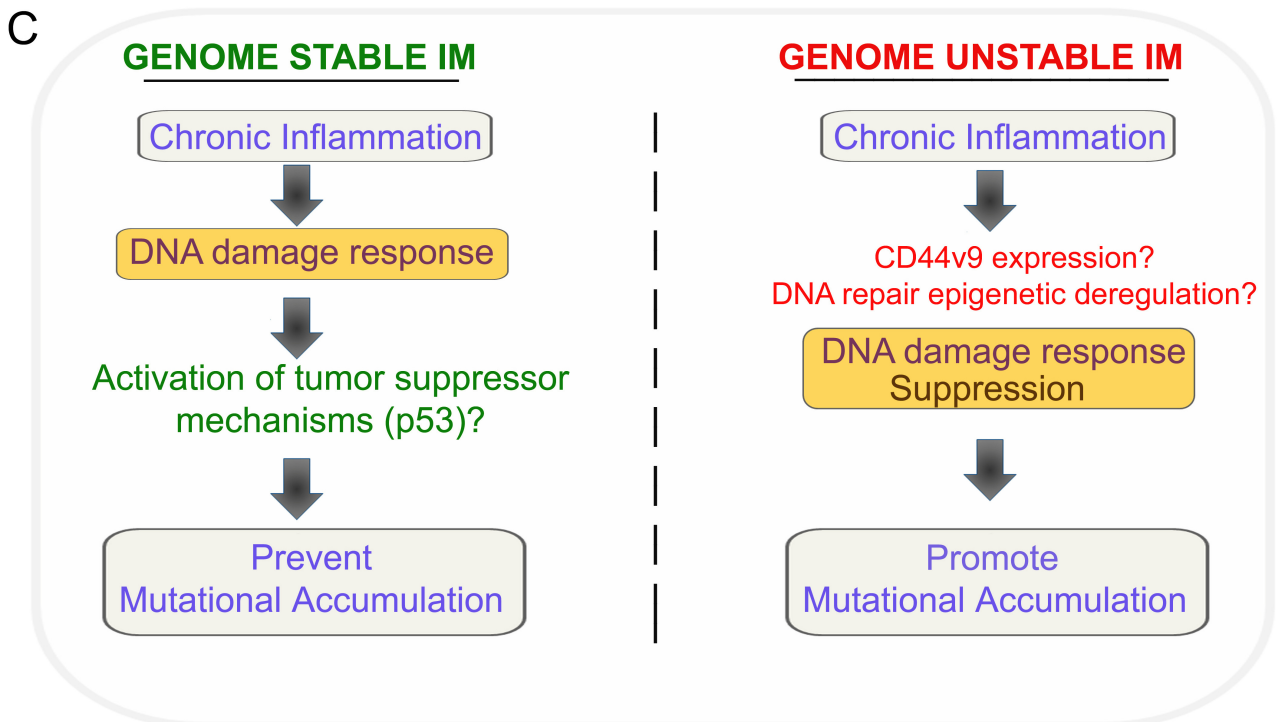

Supplement: inline-supplementary-material-9 [file inline-supplementary-material-9.pdf]
